# Supplementary material for: Metabolic Risk Factors in Patients with Kidney Stones with and without Type 2 Diabetes
Source: Research Square preprint supplement (doi:10.21203/rs.3.rs-855238/v1), 2021-09-22
Supplement: Supplementary file 1 [file 5a4c72d90c5f0646ca2568d0.pdf]

**Table 1** Demographic characteristics of 234 patients with kidney stones

| <b>Kidney Stones</b>             | <b>Type 2 diabetes<br/>n = 104</b> | <b>Controls<br/>n = 130</b> | <b>p</b> |
|----------------------------------|------------------------------------|-----------------------------|----------|
| Age (years)                      | 57.8 ± 11                          | 52.1 ± 6.7                  | NS       |
| Sex (male, female)               | M:61, F:43                         | M:66, F:64                  | -----    |
| Height (m)                       | 1.68 ± 0.1                         | 1.66 ± 0.1                  | NS       |
| Weight (kg)                      | 90 ± 17                            | 76.4 ± 15                   | < 0.01   |
| BMI(weight/height <sup>2</sup> ) | 32 ± 5                             | 27.5 ± 4.5                  | < 0.01   |

**Table 2** Single metabolic abnormalities in both controls and  
type 2 diabetes patients

| Biochemical Abnormality | Controls<br>n = 82 (77%) | Type 2 diabetes<br>n = 47 (47.5%) | p      |
|-------------------------|--------------------------|-----------------------------------|--------|
| UAU                     | 4 (3.8%)                 | 19 (19.1%)                        | <0.01  |
| HU                      | 11 (10.4%)               | 12 (12.3%)                        | NS     |
| IH                      | 47 (44.3%)               | 9 (9.0%)                          | <0.001 |
| HM                      | 4 (3.8%)                 | 3 (3.0%)                          | NS     |
| HC                      | 7 (6.6%)                 | 3 (3.0%)                          | 0.01   |
| PHPT                    | 3 (2.8%)                 | 1 (1.1%)                          | NS     |
| HOx                     | 4 (3.8%)                 | 0                                 |        |
| CYS                     | 2 (1.9%)                 | 0                                 |        |

**Table 3** Combined metabolic abnormalities in both controls  
and type 2 diabetes patients

| <b>Biochemical Abnormality</b> | <b>Controls<br/>n = 24/106 (23%)</b> | <b>type 2 diabetes<br/>n = 52/99 (52.5%)</b> | <b>p</b> |
|--------------------------------|--------------------------------------|----------------------------------------------|----------|
| IH + HC                        | 2 (1.9%)                             | 1 (1.01%)                                    | NS       |
| IH + HM                        | 2 (1.9%)                             | 7 (7.07%)                                    | NS       |
| IH + HOx                       | 1 (0.95%)                            | 1 (1.01%)                                    | NS       |
| IH + HU                        | 9 (8.75%)                            | 7 (7.07%)                                    | NS       |
| HC + HM                        | 2 (1.9%)                             | 2 (2.02%)                                    | NS       |
| HC + HU                        | 1 (0.95%)                            | 3 (3.03%)                                    | NS       |
| UAU + HOx                      | 1 (0.95%)                            | 1 (1.01%)                                    | NS       |
| UAU + HC                       | --                                   | 3 (3.03%)                                    |          |
| UAU + HM                       | --                                   | 4 (4.03%)                                    |          |
| UAU + HU                       | --                                   | 2 (2.02%)                                    |          |
| Other                          | 6 (5.7%)                             | 21 (20.7%)                                   | <0.01    |
